# Supplementary material for: Endovascular Recanalization Therapy in Acute Ischemic Stroke: Updated Meta-analysis of Randomized Controlled Trials
Source: PubMed Central journal article supplement — J Stroke. 2015 Sep 30;17(3):268–81. doi: 10.5853/jos.2015.17.3.268 (PMC4635708; doi:10.5853/jos.2015.17.3.268), 2015-09-30
Supplement: jos-17-3-268-supple1.pdf [file jos-17-3-268-supple1.pdf]

Pooling all RCTs

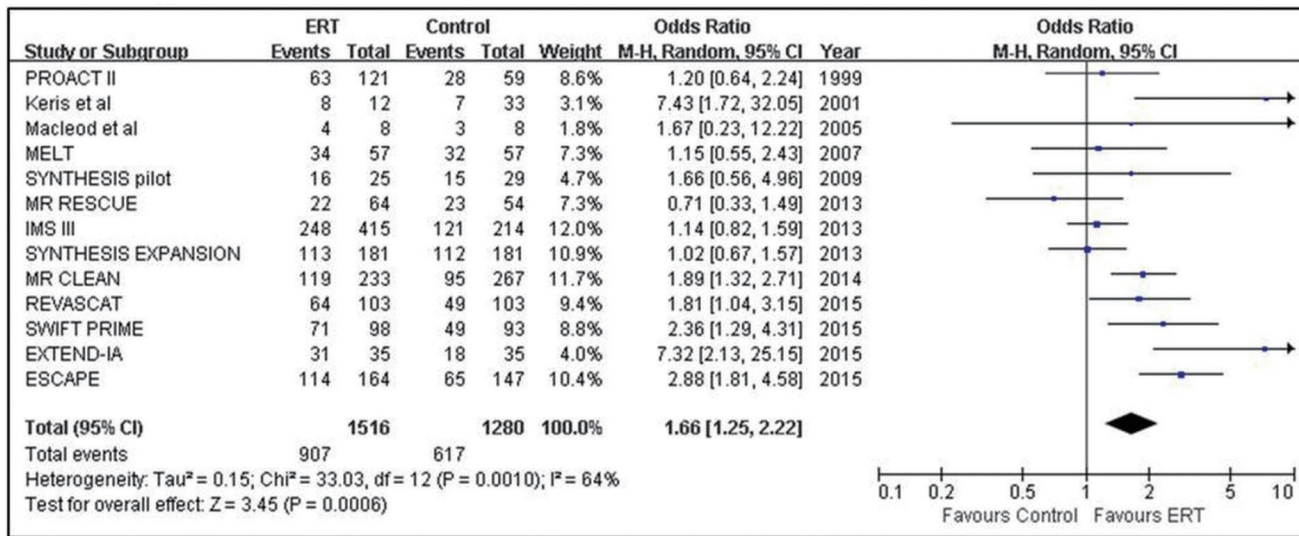

A

Pooling stent-retriever RCTs

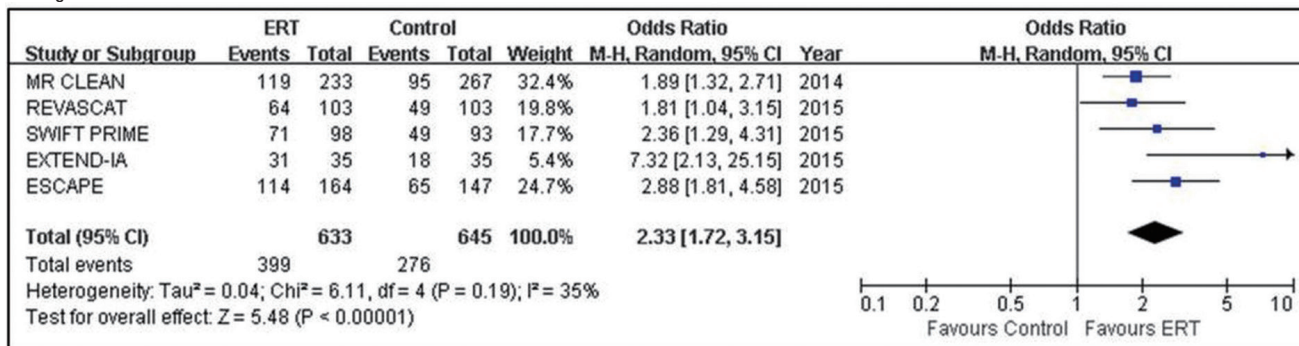

B

Pooling RCTs with IV-TPA rate > 75% in control arms

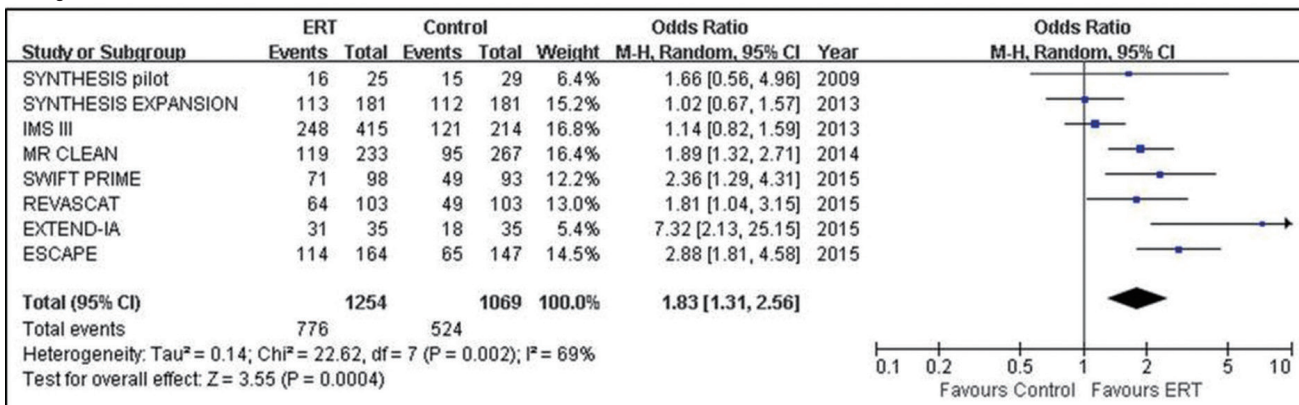

C

Supplementary Figure 1. Pooled estimates for achieving modified Rankin Scale (mRS) 0-3 outcomes with Endovascular recanalization therapy vs. control.
